# Supplementary material for: Incorporation of lumped IVOC emissions into the ORACLE model (V1.1): A multi-product framework for assessing global SOA formation from internal combustion engines
Source: Copernicus journal article supplement (doi:10.5194/egusphere-2025-2510), 2025-07-03
Supplement: Supplementary file 1 [file egusphere-2025-2510-supplement.pdf]

## Incorporation of lumped IVOC emissions into the ORACLE model (V1.1): A multi-product framework for assessing global SOA formation from internal combustion engines

5 Susanne M. C. Scholz<sup>1</sup>, Vlassis A. Karydis<sup>1</sup>, Georgios I. Gkatzelis<sup>1</sup>, Hendrik Fuchs<sup>1</sup>, Spyros N. Pandis<sup>2,3</sup>, and Alexandra P. Tsimpidi<sup>1</sup>

<sup>1</sup>Institute of Energy and Climate Research: Troposphere (ICE-3), Forschungszentrum Jülich GmbH, Jülich, 52428, Germany

<sup>2</sup>Department of Chemical Engineering, University of Patras, Patras, Greece

<sup>3</sup>Institute of Chemical Engineering Sciences (ICE-HT), FORTH, Patras, Greece

10 Correspondence to: Alexandra P. Tsimpidi (a.tsimpidi@fz-juelich.de)

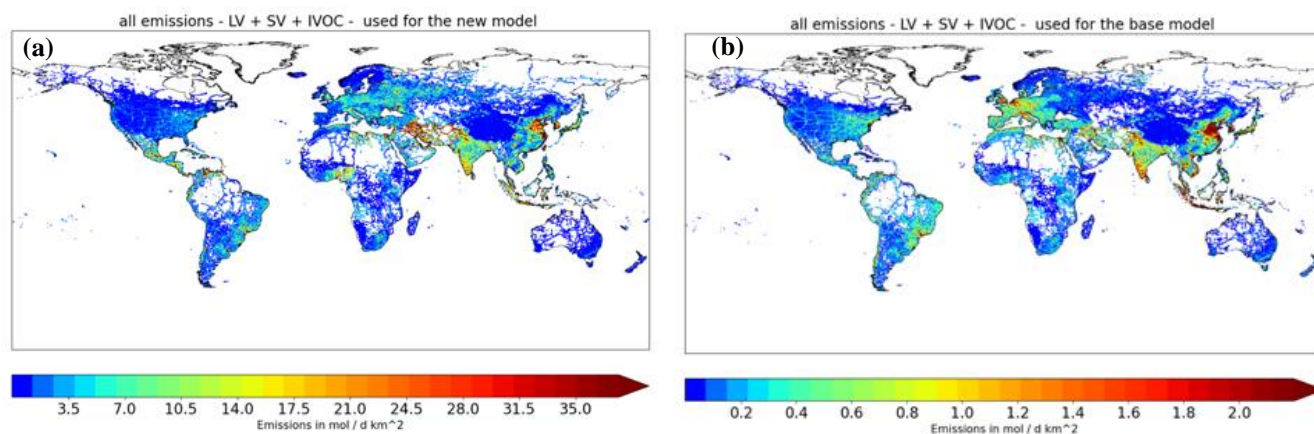

15 **Figure S1:** All primary emissions (LVOC+SVOC+IVOC) used for a) the lumped species simulation in ORACLE-IVOC and (b) the ORACLE-base simulation. In both cases, LVOC and SVOC taken from the OC inventory with proportions of 0.1 and 0.9, respectively. For (a), IVOC are considered with individual IVOC/NMVOC emission factors from both the gasoline and diesel NMVOC inventories, for (b), IVOC are approximated with 1.5 times the emissions from the OC inventory.

20

25

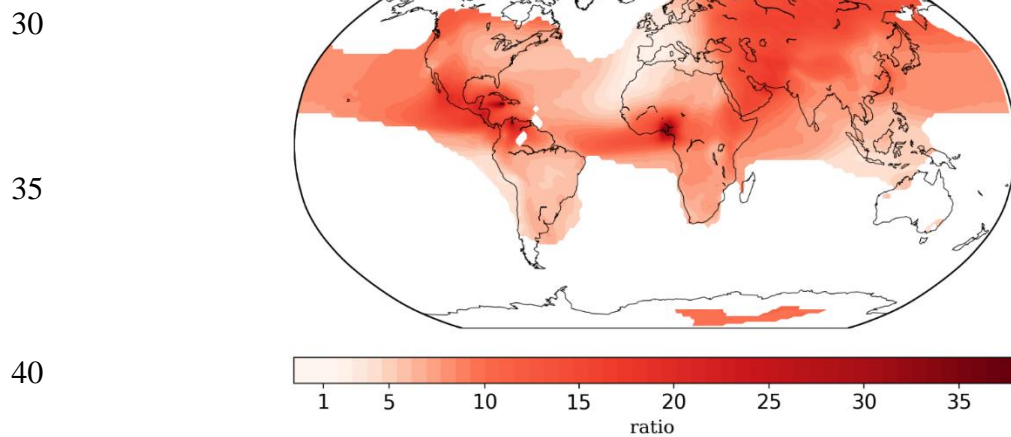

**Figure S2:** Road transport SOA-iv from ORACLE-IVOC as a multiple of SOA-iv from ORACLE-base. Locations where ORACLE-IVOC concentrations are below the 60<sup>th</sup> percentile are shown in white.

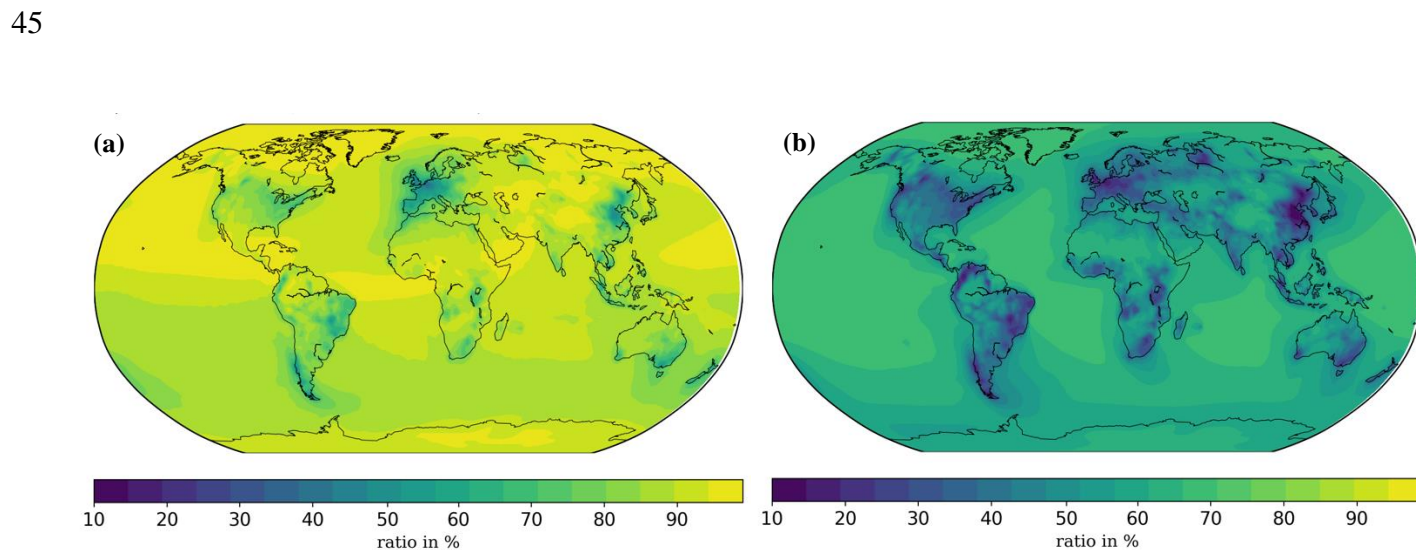

**Figure S3:** Ratio of modelled SOA-iv to total OA from road transport emissions as simulated with (a) ORACLE-IVOC and (b) ORACLE-base.
